# Supplementary material for: Elicitor-induced transcription factors for metabolic reprogramming of secondary metabolism in Medicago truncatula
Source: PubMed Central journal article supplement (PMC2628384; doi:10.1186/1471-2229-8-132), 2008-12-22

**A****JAZ 1101.m00010 / AC146572\_10 (Mtr.49627.1.S1\_at)**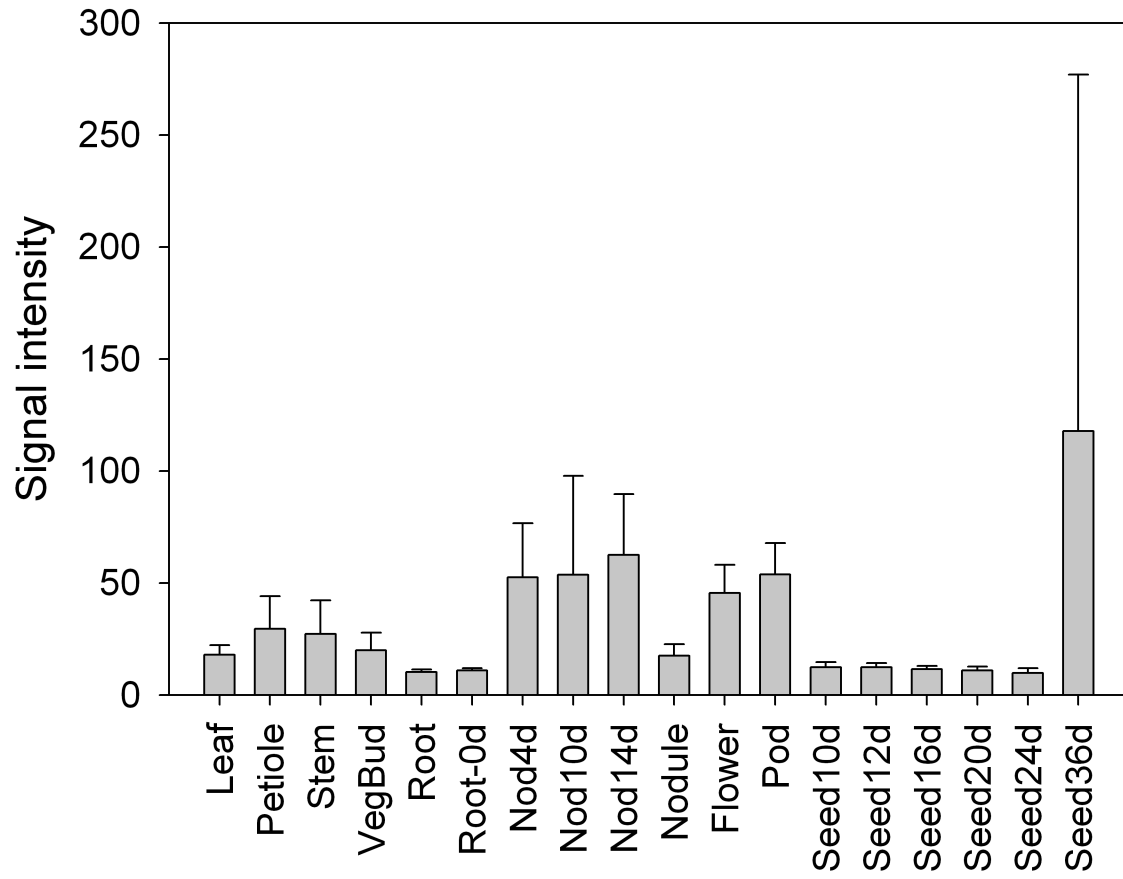**B****bHLH 1643.m00042 / AC141862\_14 (Mtr.22988.1.S1\_at)**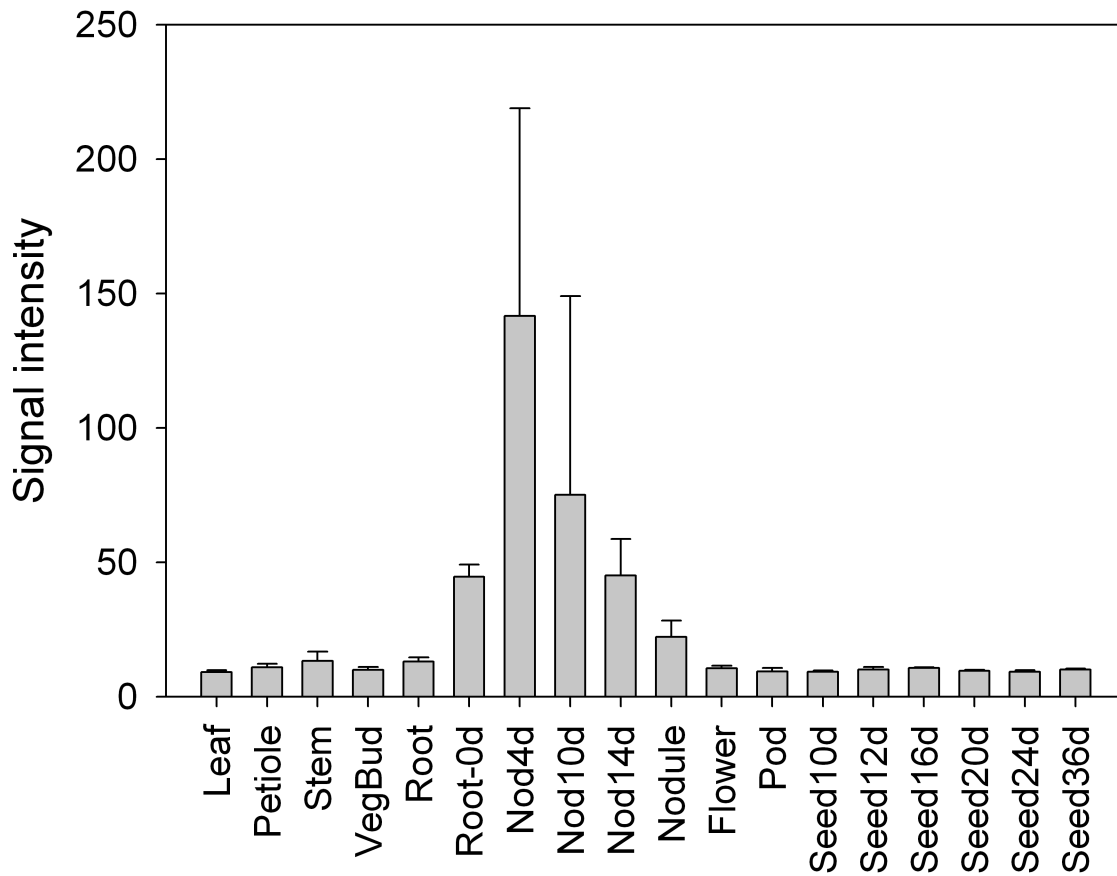

Supplement: 1471-2229-8-132-S3.pdf [file 1471-2229-8-132-S3.pdf]
