# Supplementary material for: Elicitor-induced transcription factors for metabolic reprogramming of secondary metabolism in Medicago truncatula
Source: PubMed Central journal article supplement (PMC2628384; doi:10.1186/1471-2229-8-132), 2008-12-22

Size of lesions, mm

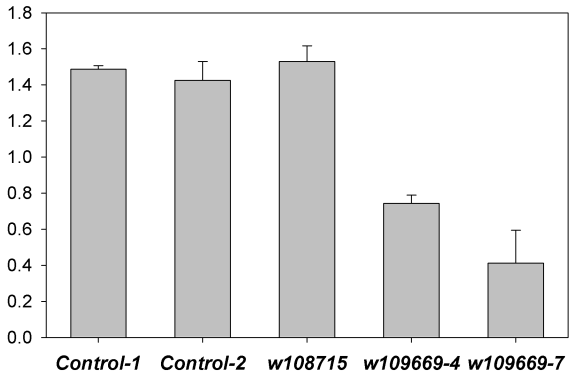

Supplement: 1471-2229-8-132-S9.pdf [file 1471-2229-8-132-S9.pdf]
